# Supplementary material for: Designing Dietary Recommendations Using System Level Interactomics Analysis and Network-Based Inference
Source: PubMed Central journal article supplement (PMC5625024; doi:10.3389/fphys.2017.00753), 2017-09-28
Supplement: Image2.pdf [file Image2.pdf]

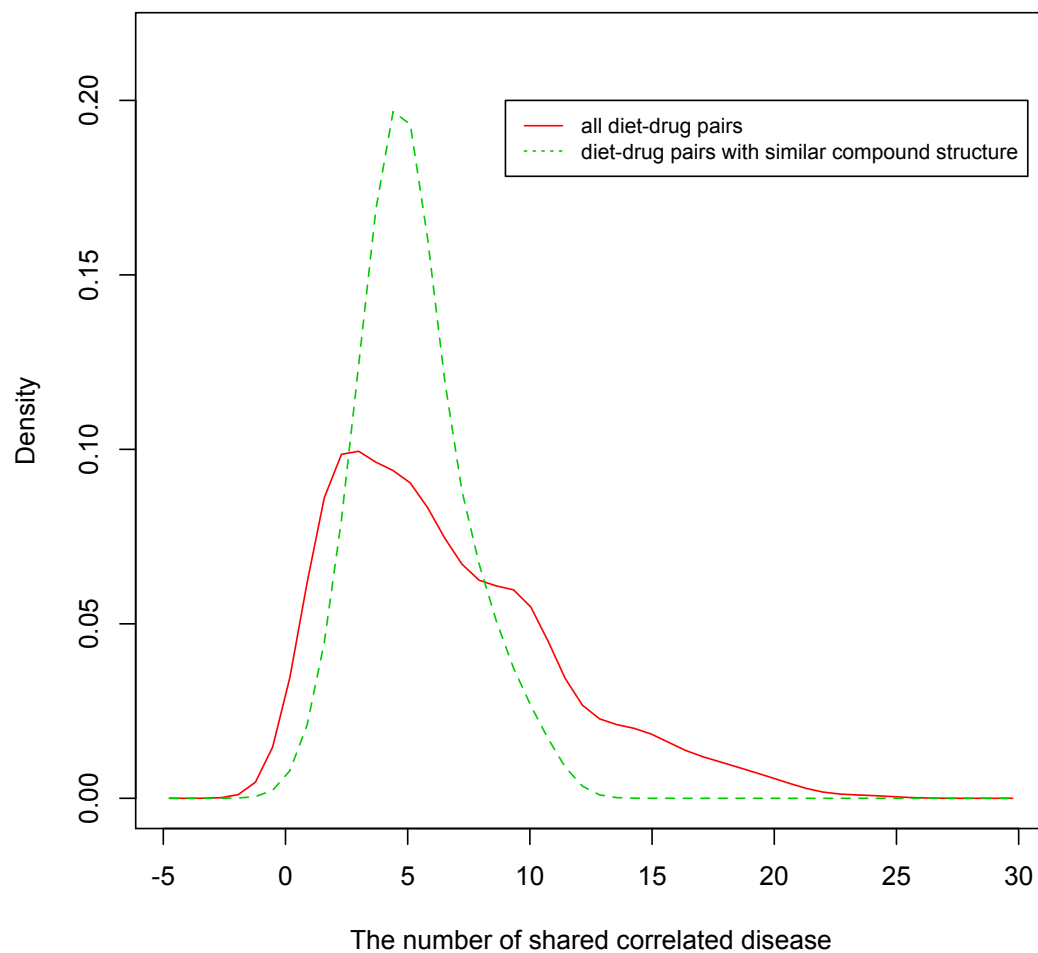

**Fig S2. Density plot showing the distribution of the number of anti-correlated diseases shared by diet-drug pairs.** Diet-drug pairs with similar compound structures tend to share more anti-correlated diseases.
