# Supplementary material for: Designing Dietary Recommendations Using System Level Interactomics Analysis and Network-Based Inference
Source: PubMed Central journal article supplement (PMC5625024; doi:10.3389/fphys.2017.00753), 2017-09-28
Supplement: Image3.pdf [file Image3.pdf]

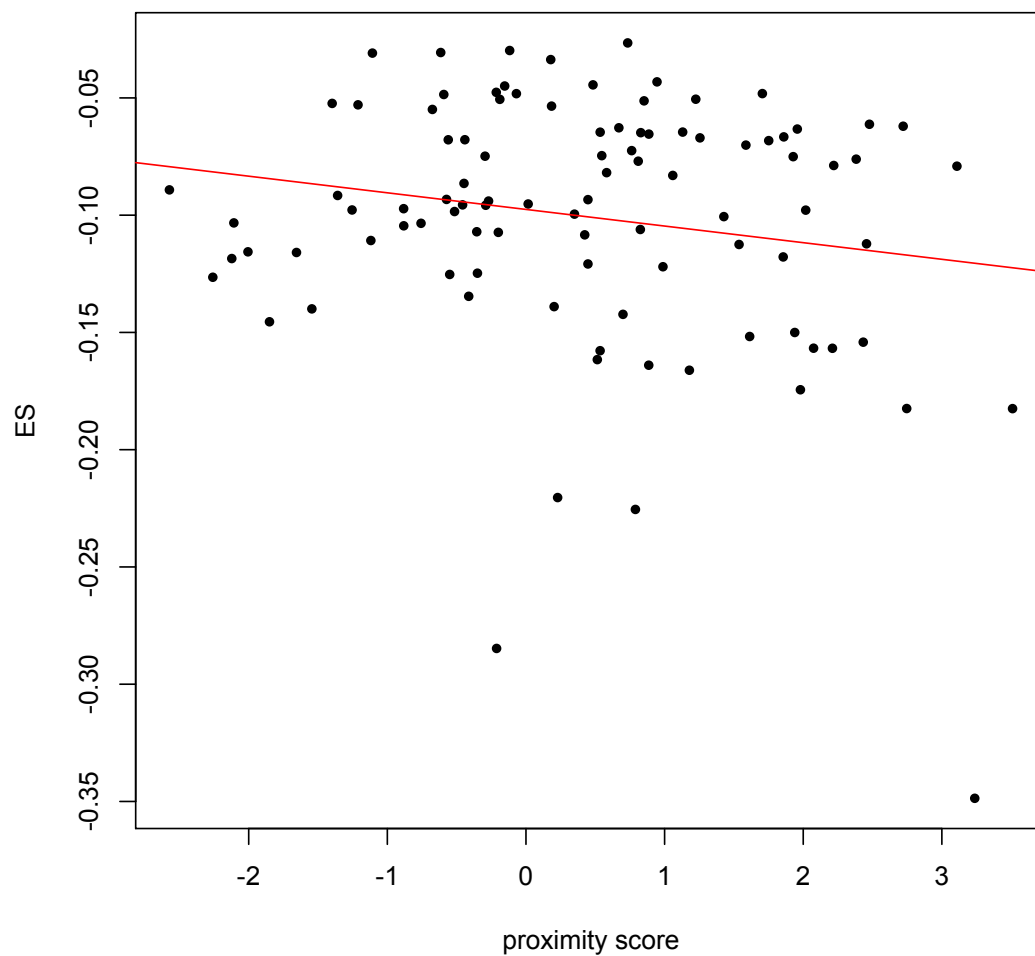

**Fig S3. Scatter plot showing the relationship between enrichment score and proximity score.** No significant correlation was observed between ES and proximity score (Spearman's correlation coefficient = -0.08, P = 0.407)
