# Supplementary material for: Designing Dietary Recommendations Using System Level Interactomics Analysis and Network-Based Inference
Source: PubMed Central journal article supplement (PMC5625024; doi:10.3389/fphys.2017.00753), 2017-09-28
Supplement: Image4.pdf [file Image4.pdf]

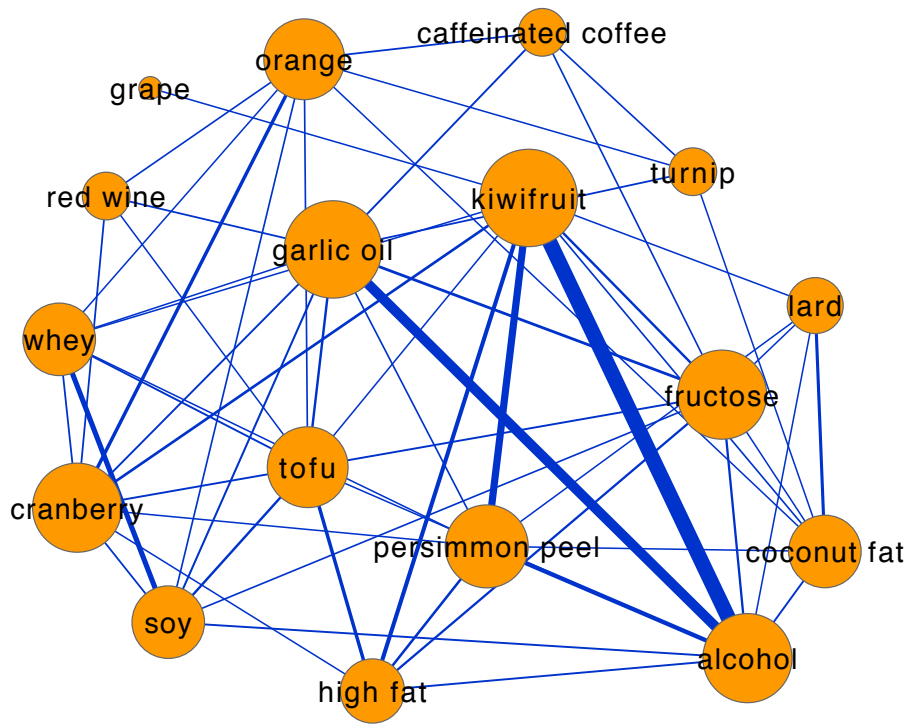

**Fig S4. Synergistic food pairs network.**
