# Supplementary material for: Designing Dietary Recommendations Using System Level Interactomics Analysis and Network-Based Inference
Source: PubMed Central journal article supplement (PMC5625024; doi:10.3389/fphys.2017.00753), 2017-09-28
Supplement: Image5.pdf [file Image5.pdf]

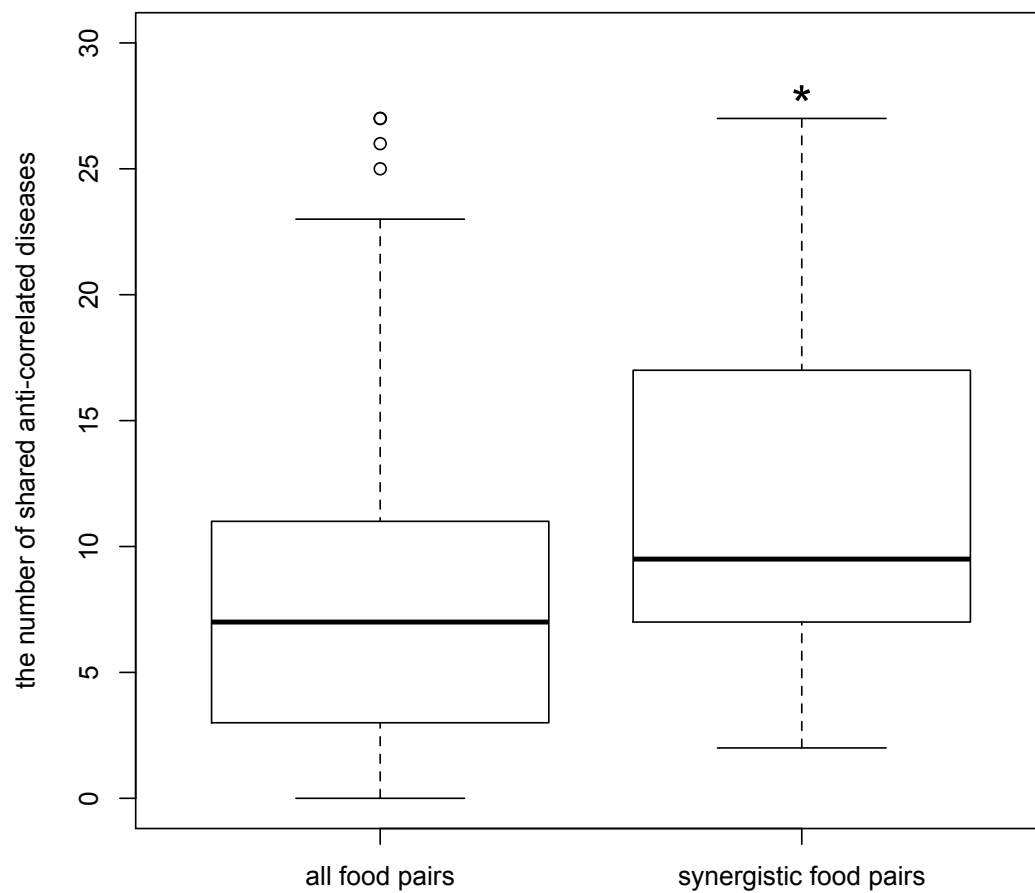

**Fig S5. Food pairs sharing anti-correlated diseases.** The plot shows synergistic food pairs that we identified as tending to share more anti-correlated diseases (Wilcoxon ranked sum test,  $P = 0.00018$ ).
